# Supplementary material for: Liraglutide-induced structural modulation of the gut microbiota in patients with type 2 diabetes mellitus
Source: PeerJ. 2021 Apr 1;9:e11128. doi: 10.7717/peerj.11128 (PMC8019531; doi:10.7717/peerj.11128)
Supplement: Table S1 [file peerj-09-11128-s004.xlsx]

## Sheet: raw  data 
Group	sample	sex	age	BMI(kg/m2)	Fasting blood glucose （mmol/L）	2 hours postprandial blood glucose（mmol/L）	Fasting insulin（pmol/ml）	HOMA-IR	Total cholesterol (mmol/L)	Triglycerides (mmol/L)	(HDL-C,mmol/L)	(LDL-C,mmol/L)	Serum creatinine（umol/L）	HbA1c (%)	HbA1c (mmol/mol)	Blood urea nitrogen（mmol/L）
L0	1	male	25	40.0833	5.79	10.01	74.7	19.22	4.73	1.61	0.83	3.4	56	5.4	35.5191	5.79
L0	2	male	26	35.0335	5.1	5.76	14.09	3.19	4.12	2.42	0.7	3.11	79.2	5.3	34.4262	4.63
L0	3	male	27	32.0503	15.31	19.5	15.04	10.23	3.64	3.43	0.96	2.26	79.1	9.5	80.3279	4.98
L0	4	male	27	26.449	14.3	18.4	15.06	9.57	3.74	3.53	0.98	2.24	78.9	9.4	79.235	4.96
L0	5	male	29	35.9184	19	26.1	8.55	7.22	4.15	7.74	0.25	1.98	51.4	10.8	94.5355	4.96
L0	6	male	29	30.4498	13.5	21	7.53	4.52	5.22	1.3	0.93	4.09	53	9.7	82.5137	6.05
L0	7	female	31	29.7339	11.73	13.7	6.21	3.24	7.4	9.14	0.84	3.64	48.8	11.4	101.093	3.62
L0	8	female	35	38.0548	6.22	10.3	13.52	3.74	5.98	3.1	0.95	2.66	55.3	5.9	40.9836	4.12
L0	9	female	35	32.0312	19.21	17.8	17.22	14.7	5.05	0.99	1.29	3.55	42.8	11.2	98.9071	4.47
L0	10	male	36	36.0854	11.3	14.4	9.38	4.71	5.8	4.09	0.73	4.42	64.1	9.2	77.0492	8.66
L0	11	male	36	31.1419	10.87	17.6	9.78	4.72	4.57	4.84	0.66	2.97	50.3	6.4	46.4481	5.96
L0	12	female	36	26.2917	20.65	23.1	7.11	6.53	8.87	11.26	0.44	3.73	40.5	11.4	101.093	4.1
L0	13	male	38	29.0657	15.45	21.8	10.25	7.04	4.2	0.89	0.75	2.34	66.4	10.3	89.071	6.22
L0	14	female	38	25.3906	14.9	16.2	6.97	4.62	3.61	0.83	1.05	2.51	38	6.8	50.8197	5.48
L0	15	male	38	28.4053	14.44	20.71	10.28	6.6	4.5	0.92	0.84	2.28	63.98	10.21	88.0874	6.19
L0	16	male	40	28.4082	13.3	10.6	7.68	4.54	5.4	2.04	1.17	4.39	72.2	10.5	91.2568	5.79
L0	17	male	41	32.6608	11.6	15.2	8.75	4.51	4.68	2.5	0.68	3.57	49.6	8.7	71.5847	4.52
L0	18	male	42	27.143	11.8	15.4	8.78	4.6	4.69	2.6	0.69	3.47	47.99	8.6	70.4918	4.61
L0	19	male	45	26.1224	7.1	12.1	13.84	4.37	5.21	4.96	0.72	3.28	67.01	6.9	51.9126	4.39
L0	20	male	47	34.22	13.6	18.9	5.46	3.3	4.76	1.65	0.87	3.55	84.8	8.9	73.7705	5.71
L0	21	female	47	25.3444	10.47	12.6	15.29	7.11	5.07	2.12	0.99	3.67	44.7	10.4	90.1639	5.72
L0	22	male	49	26.1224	7	12	13.83	4.3	5.19	4.95	0.7	3.26	64.8	6.8	50.8197	4.37
L0	23	male	49	29.4118	19.1	25.2	14.62	12.41	7.1	9.82	0.67	3.26	61.6	12.2	109.836	5.64
L0	24	male	50	30.1896	9.55	14	16.81	7.13	7.1	2.54	1.38	5.35	101.8	8.1	65.0273	5.32
L0	25	male	50	27.4406	13.8	21	7.91	4.85	8.16	16.52	0.26	3.02	63.5	9.8	83.6066	5.86
L0	26	male	50	29.3878	9.06	13.2	17.34	6.98	3.78	1.77	1.12	2.56	98.4	9.5	80.3279	8.1
L0	27	male	51	31.1419	15.38	17.4	8.48	5.8	3.68	3.33	0.75	2.35	86.3	11.3	100	8.45
L0	28	female	52	31.25	13.1	14.5	13.7	7.98	7.82	2.47	1	6.23	56.7	9.1	75.9563	7.55
L0	29	male	52	26.0617	10	18	8.41	3.74	5.97	22.58	0.18	1.8	55.5	9.7	82.5137	5.1
L0	30	male	53	32.8306	10.5	13.8	12.34	5.76	6.61	3.85	0.85	4.99	95.2	7.1	54.0984	10.03
L0	31	male	53	31.5617	15.41	18.6	31.54	21.6	4.96	2.14	1.11	3.53	58.9	10	85.7923	6.28
L0	32	male	55	29.3878	8.9	11.7	12.5	4.94	4.46	2.53	0.87	2.95	61.8	8.6	70.4918	4.26
L0	33	male	55	30.8642	6.69	11.3	16.61	4.94	3.06	1.04	0.84	1.9	81.7	7.9	62.8415	5.33
L0	34	female	57	29.2969	11.2	16.8	13.8	6.87	7.84	2.36	1.08	6.19	58.46	9.2	77.0492	7.54
L0	35	male	60	26.3958	14.79	21.36	16.98	11.16	6.78	2.15	1.21	3.43	60.36	10.9	95.6284	6.27
L0	36	male	61	28.0557	7.9	13.8	11.38	4	3.24	1.76	0.82	2.02	55.6	9.3	78.1421	3.79
L0	37	male	61	28.3848	8.4	14.3	11.43	4.27	3.74	2.11	0.91	2.18	58.76	10.02	86.0109	4.01
L0	38	male	71	27.0641	10.1	17.9	13.86	6.22	4.49	3.54	0.93	3.06	69.3	10.7	93.4426	5.75
L0	39	male	75	29.3848	10	17.8	13.84	6.15	4.48	3.53	0.92	3.05	61.8	10.8	94.5355	5.74
L0	40	female	83	32.0461	9.9	20.2	15.33	6.75	4	2.03	1.24	2.37	56.8	8.7	71.5847	7.59
L4	1	male	25	33.56	5.12	7.9	40.52	9.22	4.2	1.42	0.86	2.53	44.6	5.1	32.2404	4.93
L4	2	male	26	32.51	7.5	9.8	23.2	7.73	3.61	1.68	0.99	2.54	70.1	5.9	40.9836	5.22
L4	3	male	27	26.37	4.78	6.9	5.21	1.11	3.5	0.69	0.98	2.18	82.2	4.6	26.776	4.61
L4	4	male	27	22.16	4.68	6.8	5.19	1.08	3.4	0.68	0.97	2.16	81.9	4.7	27.8689	4.67
L4	5	male	29	32.7	8.4	10.1	10.96	4.09	4.12	1.99	0.98	2.02	45.6	6.6	48.6339	4.36
L4	6	male	29	26.32	5.8	8.3	19.3	4.98	5.54	2.81	0.98	2.88	50	8.5	69.3989	4.9
L4	7	female	31	29	5.06	8.2	10.85	2.44	1.18	0.97	1.1	2.63	41	5.3	34.4262	5.43
L4	8	female	35	33.04	5.9	7.6	13.52	3.55	5.98	1.68	1.29	4.1	63.3	5.4	35.5191	3.69
L4	9	female	35	25.5	6.33	10.2	14.1	3.97	3.59	0.74	1.17	2.09	45.7	5.3	34.4262	3.81
L4	10	male	36	30.5	7	6.9	12.62	3.93	5.48	1.37	0.97	3.95	35.4	6.3	45.3552	3.75
L4	11	male	36	30.25	7.4	8.9	13.25	4.36	3.96	1.85	1.02	2.31	50.3	6.3	45.3552	6.21
L4	12	female	36	26	4.78	8.1	4.84	1.03	3.83	0.36	1.55	1.79	42.7	4.4	24.5902	3.71
L4	13	male	38	26.32	6.5	10.2	15.03	4.34	3.93	1.12	0.95	2.26	62.3	7	53.0055	5.92
L4	14	female	38	24.25	6.3	7.9	12.96	3.63	3.55	1.16	0.96	2.12	45.2	6	42.0765	7.6
L4	15	male	38	23.61	6.3	9.8	14.98	4.19	4.01	1.19	0.96	2.31	59.13	7.2	55.1913	5.89
L4	16	male	40	26.65	6.5	10.2	16.89	4.88	2.99	2.65	0.89	2.21	56.3	7	53.0055	6.3
L4	17	male	41	29.55	7.6	9.3	45.1	15.23	5.65	2.09	0.95	4.32	71.88	6.2	44.2623	4.26
L4	18	male	42	26.29	7.8	9.4	19.8	6.86	5.64	2.08	0.96	4.35	69.1	6.3	45.3552	4.29
L4	19	male	45	23.65	6.01	8.12	12.78	3.41	3.68	0.45	1.2	1.96	48.02	5.19	33.224	3.39
L4	20	male	47	31.66	6.39	8.6	16.2	4.6	3.69	1.92	1	1.99	77.2	6.2	44.2623	5.39
L4	21	female	47	22.31	15.23	16.3	5.42	3.67	5.12	1.67	1.01	3.29	36.3	10.2	87.9781	3.02
L4	22	male	49	24.14	6	8	8.76	2.34	3.67	0.44	1.1	1.98	46.5	5.2	33.3333	3.4
L4	23	male	49	22.7	5.09	9.6	12.92	2.92	5.11	1.19	1.09	3.57	82.1	5.2	33.3333	6.42
L4	24	male	50	30	6.9	9.8	12.69	3.89	5.2	1.98	1.06	4.2	50.1	7.1	54.0984	6.23
L4	25	male	50	23.32	6.23	9.7	14.4	3.99	4.12	2.25	0.89	2.35	56.3	6.5	47.541	5.28
L4	26	male	50	29.2	5.65	8.9	13.53	3.4	6.16	2.41	1.03	4.52	47.2	6	42.0765	5.31
L4	27	male	51	23.36	15	18.1	6.17	4.11	3.25	2.67	0.82	1.78	77.9	10.9	95.6284	8.5
L4	28	female	52	30.2	6.8	7.5	6.84	2.07	4.79	0.99	1.15	3.12	47.8	5.8	39.8907	5.34
L4	29	male	52	25.9	9.29	11.2	19.25	7.95	3.57	1.54	1.01	1.93	83.1	7.3	56.2842	4.93
L4	30	male	53	28.25	7	8.9	11.28	3.51	3.87	3.32	0.76	2.51	45.2	6	42.0765	4.75
L4	31	male	53	28.23	10.09	13.1	16.1	7.22	5.38	0.99	1.28	3.8	56	7.4	57.377	9.1
L4	32	male	55	25.65	6.7	7.1	15.98	4.76	4.37	0.62	0.89	3.26	75.6	6.9	51.9126	5.85
L4	33	male	55	27.63	7	9.6	16.32	5.08	3.68	1.23	0.89	2.19	59.4	6.8	50.8197	4.95
L4	34	female	57	28.39	6.8	7.4	6.74	2.04	4.8	0.98	1.16	3.13	48.1	5.9	40.9836	5.24
L4	35	male	60	23.6	10.08	12.9	16.2	7.26	5.39	0.98	1.27	3.9	58	7.5	58.4699	8.5
L4	36	male	61	26.7	8.61	10.2	7.03	2.69	3.9	1.38	0.84	2.48	83.4	7.3	56.2842	4.62
L4	37	male	61	26.96	8.71	10.31	8.02	3.1	4.2	1.68	0.94	2.67	79.37	7.6	59.5628	4.81
L4	38	male	71	24.86	6.3	8.4	14.59	4.09	3.54	1.98	1.04	2.38	62.3	7.4	57.377	5.19
L4	39	male	75	25.66	6.2	8.3	14.68	4.05	3.55	1.96	1.03	2.36	60.2	7.2	55.1913	5.16
L4	40	female	83	26.65	9.2	11.9	10.65	4.35	3.68	2.21	1.01	2.23	48.6	7.2	55.1913	6.12
